# Supplementary material
Source: ML conference proceedings conference paper supplement (https://openaccess.thecvf.com/content/CVPR2026/html/Sun_Enhancing_Descriptive_Captions_CVPR_2026_paper.html)
Supplement: Supplementary file 1 [file Sun_Enhancing_Descriptive_Captions_CVPR_2026_supplemental.pdf]

# Enhancing Descriptive Captions with Visual Attributes for Multimodal Perception

Yanpeng Sun<sup>1,2</sup>, Jing Hao<sup>4</sup>, Ke Zhu<sup>5</sup>, Jiang-Jiang Liu<sup>3</sup>, Xiaofan Li<sup>3</sup>  
Na Zhao<sup>2</sup>, Zechao Li<sup>1,\*</sup>, Jingdong Wang<sup>3\*</sup>  
<sup>1</sup>NJUST, <sup>2</sup>SUTD, <sup>3</sup>Baidu Inc., <sup>4</sup>HKU, <sup>5</sup>NJU

## A. More Details of Cap-Workflow pipeline

### A.1. The Specific Visual Expert Model

In Cap-Workflow, we employ different visual expert models to obtain object-level and relation-level attribute labels. The main paper provides an overview of the process for obtaining different attributes and briefly introduces the types of Visual Specialists used. In Table 1, we will further elaborate on the off-the-shelf visual specialists employed in the Cap-Workflow pipeline. Based on our experience, existing open-source OCR models exhibit suboptimal performance in accurately recognizing text in images. To enhance OCR accuracy, we leverage Baidu’s API <sup>1</sup>, which offers superior text recognition capabilities. Additionally, for attributes such as logo, celebrity, and landmark recognition, the limited availability of labeled data poses a challenge. To mitigate this, we also utilize Baidu’s API <sup>2</sup> to better capture these attributes, ensuring more precise and comprehensive annotations. Meanwhile, as a simple and versatile framework, Cap-Workflow allows users to flexibly select the most suitable visual specialist models based on their available resources.

### A.2. The Detail of Relation Attributes

Relation Attributes play a crucial role in image captioning. Among them, HOI captures human-object interactions, while 2D Absolute Location describes an object’s position within the image. Since such information is relatively sparse, we retain all relations in the captions. In contrast, 2D/3D Relative Location encodes spatial relationships between objects, which can become abundant and redundant as the number of objects increases. To address this, we retain only one dominant relationship per image for 2D/3D Relative Location, prioritizing the one with the greatest relative distance to ensure accuracy.

### A.3. The Prompt Templates of Cap-Workflow

To effectively transform extracted visual attributes into natural language, Cap-Workflow designs two structured prompt templates that guide the LLM to convert discrete visual signals into coherent and readable descriptions. The first template focuses on object-level attributes, integrating multiple properties of each individual object. The second focuses on relation-level attributes, summarizing the relationships among different objects. The entire process is designed to mimic human perception: *first describing what each object is, and then explaining how these objects relate to each other within the scene.*

For the object-level prompt template (as shown in Figure 1), the LLM uses structured attributes extracted by visual specialists—such as category, color, texture, emotion, fine-grained classification (e.g., replacing “dog” with “golden retriever”), OCR content, and depth—to check whether the reference caption already includes these details. If a specific attribute is missing, it will be added; if it conflicts with the extracted value, the information from the visual specialist takes priority. This process allows the model to merge all attributes into a richer region-level description without redundancy or hallucinated content. For example, the prompt explicitly defines conditional rules such as “*If a fine-grained animal category is available, replace the coarse label with the specific species; otherwise, keep the original name.*” Likewise, it guides the LLM to naturally embed OCR text, detected emotions, and visual context into the caption, producing region-level descriptions that are both accurate and fluent.

For the relation-level prompt template (as shown in Figure 2), the LLM incorporates the relationships among different objects into the overall image caption. Among these, the P2O relations are directly obtained from the HOI model, while other types of relations are derived from detection and depth models. Specifically, the detection model provides the count of objects and, based on their bounding boxes, determines both 2D absolute locations and 2D relative locations to describe spatial relationships on the image plane.

\*Corresponding author.

<sup>1</sup><https://ai.baidu.com/tech/ocr/general>

<sup>2</sup><https://ai.baidu.com/tech/imagerecognition>

The depth model, on the other hand, extracts a depth value for each object from its bounding box and the depth map. By comparing the depth values between objects, the model can infer their 3D spatial relationships, such as whether object A is in front of or behind object B. Moreover, incorporating the object-level captions further enriches the image caption with detailed visual information. This structured prompting process ensures that the model maintains spatial grounding while merging scattered regional details into one coherent and comprehensive image-level description.

In practice, both templates are implemented as single-turn structured prompts rather than multi-turn reasoning. Each prompt directly guides the LLM to generate captions based on the provided visual attributes and contextual cues, without requiring iterative dialogue. The object-level template focuses on enriching region descriptions with fine-grained visual details, while the relation-level template integrates spatial and interaction information to form a complete image-level caption. Together, these two prompts enable Cap-Workflow to seamlessly connect perception-level attributes with natural language expression, producing captions that are more detailed, precise, and contextually grounded than those from conventional LMMs.

## B. Analysis of Cap-Workflow datasets

The Cap-Workflow dataset consists of two parts: Cap-Workflow-1M, comprising 1 million diverse image-text pairs sampled from the Laion dataset [12], and Cap-Workflow-118K, comprising 118,000 real image-text pairs from the COCO dataset [7]. Next, we will analyze the captions in Cap-Workflow-118K and compare them with captions annotated by humans [3] and generic LMM models [4, 6].

### B.1. The Caption Length

In general, the longer caption could convey more detailed visual content. We compared the caption length of Cap-Workflow-118k with human annotations as well as captions generated by advanced MLLM models, InternVL2-26B [4] and LLaVA-Next-34B [6]. The results are summarized in Table 2. It was observed that human-generated captions were the shortest, as they typically focus on only the most salient objects. The InternVL2-26B could generate more longer captions, with approximately 106 tokens. The captions generated by LLaVA-Next-34B were the longest, averaging around 228 tokens, while Cap-Workflow-118k produced captions with an average of 218 tokens, approximately 10 tokens fewer than those of LLaVA-Next-34B.

### B.2. The Lexical Composition

We conducted a detailed analysis of the lexical composition of the captions to evaluate how effectively each model described the visual content. This analysis examined the

variety, frequency, and distribution of different word categories, including nouns, verbs, adjectives, adverbs, numerals, and more. As shown in Fig. 3, Cap-Workflow-118k contained the highest average number of lexical elements per sentence, demonstrating a more diverse and complex linguistic structure compared to other captions generated by other datasets. This richer composition indicates that Cap-Workflow-118k was better equipped to deliver nuanced and detailed descriptions of visual scenes, using a wider range of grammatical constructs to convey more comprehensive information.

### B.3. The Word Clouds

In Fig. 4, we present word clouds for the captions generated by InternVL2-26B, LLaVA-Next-34B, and our Cap-Workflow pipeline. These visualizations highlight the most frequently used words across the different captioning methods, providing an intuitive comparison of the lexical patterns and focus areas of each caption. By examining the word clouds, we observed that the captions generated by our Cap-Workflow exhibited a notably diverse vocabulary. In particular, there was a significantly higher frequency of words describing the relative spatial relationships of objects, both in 2D and 3D space like *'left side'*, *'right region'*, *'front'*, and *'behind'*, compared to captions produced by other methods. This indicates that Cap-Workflow not only captured a wider range of visual details but also excelled in conveying the spatial context of objects within the scenes, offering more comprehensive descriptions of the visual content.

## C. Training Details

We elaborate the training details and hyper-parameters used in our experiments for evaluating the effectiveness of Cap-Workflow-1M generated by our Cap-Workflow pipeline. The whole training step consists of three stages, as shown in Table 3. During the pre-alignment stage, we exclusively train the projector, resulting in a more stable and consistent vision-language connection. In the pre-training phase, similar with ShareGPT4V [1], we unfreeze the Vision Encoder (VE) for the last 12 layers, the Language Model (LM), and the projector. Regarding the instruction tuning stage, we use the open-source LLaVA-mix-665K [8] and LLaVA-NeXT-data to fine-tune both the projector and language model of the LLaVA-v1.5 [8] and LLaVA-NeXT [6] models, respectively.

## D. Detailed Evaluation Results

To highlight the significant improvements Cap-Workflow-generated image descriptions bring to model performance, we present a detailed evaluation of the MMBench results in Table 4. These results demonstrate how high-quality im-

```

messages = [{"role": "system", "content": f "" You are an AI visual assistant tasked with generating a detailed region caption by combining multiple visual attributes. Given a brief reference caption of the region and the object attributes provided by various visual experts, create a single, cohesive description that includes all relevant details.

Ensure that the final caption:
1. Integrates the reference caption with the attributes to produce a richer, more comprehensive description.
2. Retains all region-level attribute information, such as colors, textures, object types, and spatial relationships.

It is important to preserve region-level attributes information. Remember you could not return any digital coordinates."}]

brief_region_queries = "The brief description of this region is {reference caption}. "

if region_attributes["object"] is not None:
    cat_name = region_attributes["object"]
    det_query = "The detection model found that this is {cat_name}. "

if region_attributes["emotion"] is not None:
    emotion = region_attributes["emotion"]
    emotion_query = "The emotion model found that the person with {emotion} in the caption."

if region_attributes["OCR"] is not None:
    OCR_str = region_attributes["OCR"]["str"]
    OCR_bbox = region_attributes["OCR"]["bbox"]
    ocr_query = "The OCR model found that the OCR information in {OCR_bbox} and add the information '{OCR_str}'."

if region_attributes["fine_grained"]["aircraft"] is not None:
    aircraft_name = region_attributes["fine_grained"]["aircraft"]
    aircraft_query = "If the airplane exits in the region, use the {aircraft_name} with airplane in the caption; otherwise, do not mention {aircraft_name}."

if region_attributes["fine_grained"]["animal"] is not None:
    animal_name = region_attributes["fine_grained"]["animal"]
    animal_query = "{cat_name} exits in the region and {animal_name} is the {cat_name}'s subclass, use {animal_name} in the caption; otherwise, do not mention {animal_name}."

if region_attributes["fine_grained"]["plants"] is not None:
    plants_name = region_attributes["fine_grained"]["plants"]
    plants_query = "{cat_name} exits in the region and {plants_name} is the {cat_name}'s subclass, use {plants_name} in the caption; otherwise, do not mention {plants_name}."
...

if region_attributes["fine_grained"]["logo"] is not None:
    logo_name = box["logo"]
    logo_query += "If {logo_name} exits in the region, add the {logo_name} in the caption; otherwise, do not mention {logo_name}."

query = ".join([brief_region_queries, det_query, emotion_query, ocr_query, aircraft_query, animal_query, plants_query, ... logo_query ])
messages.append({"role": "user", "content": "\n".join(query)})

```

Figure 1. The prompt for using LLM to generate an region caption by considering object attributes and reference captions.

Table 1. The Specific Visual Expert Model of Cap-Workflow.

| Detection Model    |               | Depth Model            | OCR Model        | HoI Model        | Emotion Model |                  |
|--------------------|---------------|------------------------|------------------|------------------|---------------|------------------|
| In-domain          | Open world    |                        |                  |                  |               |                  |
| Group Detr [2]     | LaMI-DETR [5] | Depth Anything V2 [14] | API <sup>1</sup> | RLIPv2 [15]      | [11]          |                  |
| Fine-Grained Model |               |                        |                  |                  |               |                  |
| Animal             | Plant         | Aircrafts              | Logo             | Landmark         | Food          | Celebrity        |
| BioClip [13]       | BioClip [13]  | MMALNet [16]           | API <sup>2</sup> | API <sup>2</sup> | PreNet [10]   | API <sup>2</sup> |

Table 2. Comparison of the different caption datasets. The "ATL" abbreviates the "Average Token Length". The token length is counted by the tokenizer of Vicuna-v1.5

| Captioned by   | Image Source | Samples | ATL of Caption |
|----------------|--------------|---------|----------------|
| Human          | COCO         | 118k    | 14.67          |
| InternVL2-26B  |              |         | 105.80         |
| LLaVA-NeXT-34B |              |         | 227.68         |
| Cap-Workflow   |              |         | 217.71         |

age descriptions enhance the model’s capabilities, particularly in logical reasoning, attribute reasoning, and relational

reasoning. This improvement is driven by Cap-Workflow’s ability to accurately capture object relationships and detailed attributes within images, enabling more effective reasoning and a deeper understanding of object interactions and characteristics.

Moreover, Cap-Workflow-generated descriptions achieve competitive performance in both fine-grained and coarse perception tasks, showcasing the effectiveness of integrating various visual experts to emulate manual annotation. This approach enriches visual information, resulting in higher accuracy and robustness in tasks like visual question answering and image comprehension.

messages = [{"role": "system", "content": f""You are an AI visual assistant tasked with creating a more complete image description by merging the following information. You are provided with a **brief description of the entire image and some descriptions of specific image regions**.

**The region descriptions consist of two parts: 1. The location of the region on the image. 2. A detailed description of the region.** The location is represented as a bounding box in the format (x1, y1, x2, y2), with floating-point values ranging from 0 to 1. These values correspond to the coordinates of the top-left corner (x1, y1) and the bottom-right corner (x2, y2).

Please identify the correspondence between the objects mentioned in the brief description and those in the region descriptions. The region descriptions might be related to objects mentioned in the overall image description or in other region descriptions. Avoid repeating the description of the same object.

Note that the person providing the region descriptions can only see parts of the image, so the focus of these descriptions may differ. Your final output should be a complete image description that integrates all the relevant information. You do not need to address any contradictions between the brief description and the region descriptions, simply retain the useful information.

**It is important to preserve OCR information, relative location information within the image, and the spatial relationships between objects as much as possible. Remember you could not return any digital coordinates.**""}]

```
brief_image_queries = "The brief description of this image is {reference caption}. "
hoi_queries = "In the image, "
for person_box, relation in imaga_attributes["hoi"].items():
    hoi_queries += "the person in{person_box} is{relation}, "

count_queries = "In the image, there is "
for category, count in imaga_attributes["count"].items():
    count_queries += "{count} {category}, "

region_queries = ""
for instance_attribute in instance_attributes:
    pos = instance_attribute["bbox"]
    category = instance_attribute["object"]
    region_caption = instance_attribute["detail_caption"]
    2d_location = imaga_attributes["2D_Relative_Location"][pos]
    region_query = "In {pos}, there is a {category} in {2d_location} and the brief description of this region is: {region_description} ".
    region_queries = ".join(region_queries, region_query)

3d_location_queries = ""
for region, 3d_relation in imaga_attributes["3D_Relative_Location"].items():
    category_0, bbox_0 = region[0][cls_name], region[0][bbox]
    category_1, bbox_1 = region[1][cls_name], region[1][bbox]
    3d_location_query = "Relative to the camera, the {category_0} in {bbox_0} of the image is {3d_relation} {category_1} in {bbox_1} of the image"
    3d_location_queries = ".join(3d_location_queries, 3d_location_query)

query = ".join([brief_image_queries, hoi_queries, count_queries, region_queries, 3d_location_queries ])
messages.append({"role": "user", "content": "\n".join(query)})
```

Figure 2. The prompt for LLM to generate an image caption by considering relation attributes, region location information and captions.

Table 3. Training details and hyper-parameters used in our experiments. ‘VE’ means the vision encoder of CLIP for the last 12 layers, and ‘LM’ refers to the language model.

| Hyper-parameter  | Pre-aligning    | Pre-training                                                          | Instruction Tuning                                                      |
|------------------|-----------------|-----------------------------------------------------------------------|-------------------------------------------------------------------------|
| Batch Size       | 256             | 256                                                                   | 128                                                                     |
| Learning Rate    | 2e-5            | 2e-5                                                                  | 2e-5                                                                    |
| LR Schedule      |                 | cosine decay                                                          |                                                                         |
| LR Warmup Ratio  | 0.01            | 0.01                                                                  | 0.01                                                                    |
| Weight Decay     | 0               | 0                                                                     | 0                                                                       |
| Trainable Module | Projector       | <b>LLaVA-v1.5:</b> Projector, VE, LM<br><b>LLaVA-NeXT:</b> Full Model | <b>LLaVA-v1.5:</b> Projector, LM<br><b>LLaVA-NeXT:</b> Full Model       |
| Epoch            | 1               | 1                                                                     | 1                                                                       |
| Optimizer        |                 | AdamW                                                                 |                                                                         |
| DeepSpeed stage  | 3               | 3                                                                     | 3                                                                       |
| Dataset          | Cap-Workflow-1M | Cap-Workflow-1M                                                       | <b>LLaVA-v1.5:</b> LLaVA-mix-665K<br><b>LLaVA-NeXT:</b> LLaVA-NeXT-data |

## E. Visualizations on Cap-Workflow

To visually demonstrate the quality of captions annotated by Cap-Workflow, we compared them with captions gen-

erated by generic LMMs, such as InternVL2-26B and LLaVA-NeXT-34B. The visualization highlights the differences in caption quality, providing a clear comparison of Cap-Workflow’s detailed and accurate descriptions against

Table 4. CircularEval multi-choice accuracy results on MMBench [9] dev set. We adopt the following abbreviations: LR for Logical Reasoning; AR for Attribute Reasoning; RR for Relation Reasoning; FP-C for Fine-grained Perception (Cross Instance); FP-S for Finegrained Perception (Single Instance); CP for Coarse Perception.

| Annotation Method  | MMBench-CN  |             |             |             |             |             |             | MMBench     |             |             |             |             |             |             |
|--------------------|-------------|-------------|-------------|-------------|-------------|-------------|-------------|-------------|-------------|-------------|-------------|-------------|-------------|-------------|
|                    | Overall     | LR          | AR          | RR          | FP-S        | FP-C        | CP          | Overall     | LR          | AR          | RR          | FP-S        | FP-C        | CP          |
| InternVL2-26B [4]  | 56.9        | 28.8        | 58.8        | <b>59.1</b> | 54.9        | 44.1        | 74.0        | 64.8        | 35.6        | 68.3        | <b>57.4</b> | <b>70.3</b> | 52.4        | 77.4        |
| LLaVA-NeXT-34B [6] | 56.5        | 28.8        | 60.3        | 56.5        | 54.3        | 42.0        | 74.3        | 64.9        | 31.4        | 68.3        | 57.4        | 69.3        | <b>54.5</b> | <b>79.7</b> |
| Cap-Workflow       | <b>58.2</b> | <b>29.7</b> | <b>62.3</b> | 57.4        | <b>56.7</b> | <b>45.5</b> | <b>74.7</b> | <b>65.8</b> | <b>37.3</b> | <b>71.4</b> | 57.4        | 70.0        | 53.8        | 78.4        |
| InternVL2-26B [4]  | 58.8        | 31.4        | 60.3        | 51.3        | 56.0        | 51.0        | 78.4        | 66.7        | 36.4        | 71.4        | 59.1        | 66.9        | <b>62.9</b> | 80.1        |
| LLaVA-NeXT-34B [6] | 59.8        | 31.3        | 60.8        | 54.8        | 56.7        | 49.7        | <b>80.7</b> | 67.2        | 38.1        | <b>69.8</b> | 57.4        | <b>69.3</b> | 60.1        | 82.1        |
| Cap-Workflow       | <b>60.1</b> | <b>31.4</b> | <b>62.3</b> | <b>55.7</b> | <b>57.0</b> | <b>51.0</b> | 79.1        | <b>68.5</b> | <b>39.0</b> | <b>72.4</b> | <b>67.8</b> | 67.9        | 59.4        | <b>82.8</b> |

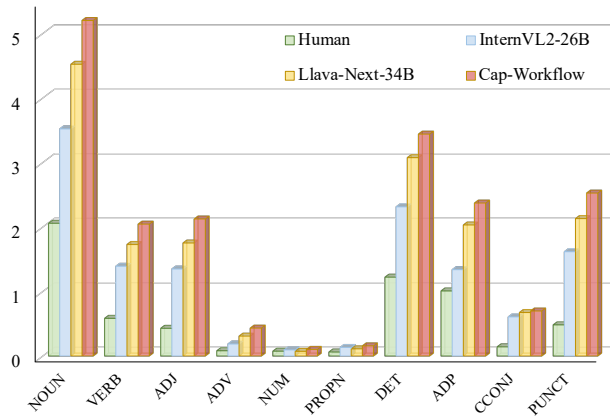

Figure 3. Comparison of lexical composition of the captions generated by different methods. The y-axis represents the average frequency of each class of lexical per sentence in the datasets.

those produced by the LMMs. As shown in Figure 5, Cap-Workflow captions consistently capture more nuanced object attributes, relationships, and contextual details, showcasing its superior annotation capabilities. This comparison underscores Cap-Workflow’s effectiveness in generating high-quality captions that enhance downstream visual-language tasks.

## References

- [1] Lin Chen, Jinsong Li, Xiaoyi Dong, Pan Zhang, Conghui He, Jiaqi Wang, Feng Zhao, and Dahua Lin. Sharegpt4v: Improving large multi-modal models with better captions. In *European Conference on Computer Vision*, pages 370–387, 2024. 2
- [2] Qiang Chen, Xiaokang Chen, Jian Wang, Shan Zhang, Kun Yao, Haocheng Feng, Junyu Han, Errui Ding, Gang Zeng, and Jingdong Wang. Group detr: Fast detr training with group-wise one-to-many assignment. In *Proceedings of the IEEE/CVF International Conference on Computer Vision*, pages 6633–6642, 2023. 3
- [3] Xinlei Chen, Hao Fang, Tsung-Yi Lin, Ramakrishna Vedantam, Saurabh Gupta, Piotr Dollár, and C Lawrence Zitnick. Microsoft coco captions: Data collection and evaluation server. *arXiv preprint arXiv:1504.00325*, 2015. 2
- [4] Zhe Chen, Jiannan Wu, Wenhai Wang, Weijie Su, Guo Chen, Sen Xing, Muyan Zhong, Qinglong Zhang, Xizhou Zhu, Lewei Lu, et al. Internvl: Scaling up vision foundation models and aligning for generic visual-linguistic tasks. In *Proceedings of the IEEE/CVF Conference on Computer Vision and Pattern Recognition*, pages 24185–24198, 2024. 2, 5
- [5] Penghui Du, Yu Wang, Yifan Sun, Luting Wang, Yue Liao, Gang Zhang, Errui Ding, Yan Wang, Jingdong Wang, and Si Liu. Lami-detr: Open-vocabulary detection with language model instruction. In *European Conference on Computer Vision*, pages 312–328, 2025. 3
- [6] Bo Li, Kaichen Zhang, Hao Zhang, Dong Guo, Renrui Zhang, Feng Li, Yuanhan Zhang, Ziwei Liu, and Chunyuan Li. Llava-next: Stronger llms supercharge multimodal capabilities in the wild, 2024. 2, 5
- [7] Tsung-Yi Lin, Michael Maire, Serge Belongie, James Hays, Pietro Perona, Deva Ramanan, Piotr Dollár, and C Lawrence Zitnick. Microsoft coco: Common objects in context. In *European Conference on Computer Vision*, pages 740–755, 2014. 2
- [8] Haotian Liu, Chunyuan Li, Yuheng Li, and Yong Jae Lee. Improved baselines with visual instruction tuning. In *Proceedings of the IEEE/CVF conference on computer vision and pattern recognition*, pages 26296–26306, 2024. 2
- [9] Yuan Liu, Haodong Duan, Yuanhan Zhang, Bo Li, Songyang Zhang, Wangbo Zhao, Yike Yuan, Jiaqi Wang, Conghui He, Ziwei Liu, et al. Mmbench: Is your multi-modal model an all-around player? In *European conference on computer vision*, pages 216–233. Springer, 2024. 5
- [10] Weiqing Min, Zhiling Wang, Yuxin Liu, Mengjiang Luo, Liping Kang, Xiaoming Wei, Xiaolin Wei, and Shuqiang Jiang. Large scale visual food recognition. *IEEE Transactions on Pattern Analysis and Machine Intelligence*, 45(8): 9932–9949, 2023. 3
- [11] Andrey Savchenko. Facial expression recognition with adaptive frame rate based on multiple testing correction. In *International Conference on Machine Learning*, pages 30119–30129, 2023. 3
- [12] Christoph Schuhmann, Romain Beaumont, Richard Vencu, Cade Gordon, Ross Wightman, Mehdi Cherti, Theo

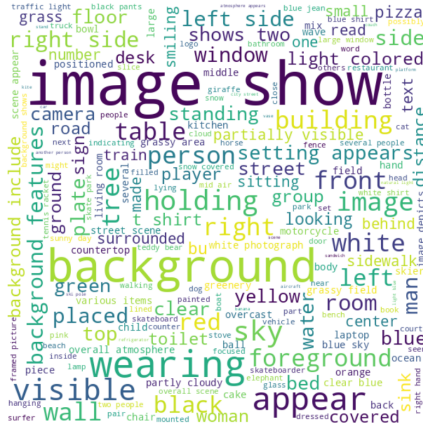

InternVL2

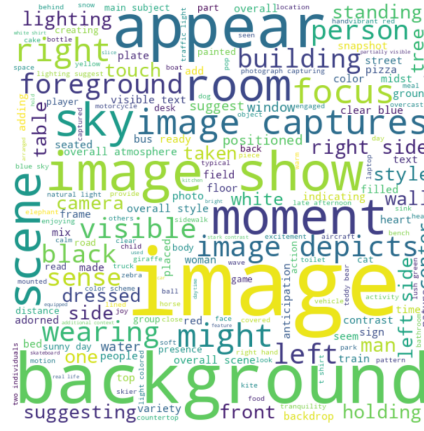

Llva-NeXT

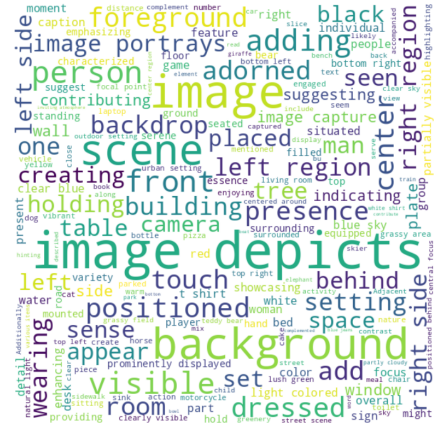

Cap-Workflow

Figure 4. Word Cloud of captions generated by InternVL2, LLaVA-Next and Cap-Workflow.

Coomes, Aarush Katta, Clayton Mullis, Mitchell Wortsman, et al. Laion-5b: An open large-scale dataset for training next generation image-text models. In *Advances in Neural Information Processing Systems*, pages 25278–25294, 2022.

2

- [13] Samuel Stevens, Jiaman Wu, Matthew J Thompson, Elizabeth G Campolongo, Chan Hee Song, David Edward Carlyn, Li Dong, Wasila M Dahdul, Charles Stewart, Tanya Berger-Wolf, et al. Bioclip: A vision foundation model for the tree of life. In *Proceedings of the IEEE Conference on Computer Vision and Pattern Recognition*, pages 19412–19424, 2024.

3

- [14] Lihe Yang, Bingyi Kang, Zilong Huang, Zhen Zhao, Xiao-gang Xu, Jiashi Feng, and Hengshuang Zhao. Depth anything v2. In *Advances in Neural Information Processing Systems*, pages 21875–21911, 2024. 3

- [15] Hangjie Yuan, Shiwei Zhang, Xiang Wang, Samuel Albanie, Yining Pan, Tao Feng, Jianwen Jiang, Dong Ni, Yingya Zhang, and Deli Zhao. Rlipv2: Fast scaling of relational language-image pre-training. In *Proceedings of the IEEE International Conference on Computer Vision*, 2023. 3

- [16] Fan Zhang, Meng Li, Guisheng Zhai, and Yizhao Liu. Multi-branch and multi-scale attention learning for fine-grained visual categorization. In *International Conference on Multi-Media Modeling*, pages 136–147, 2021. 3

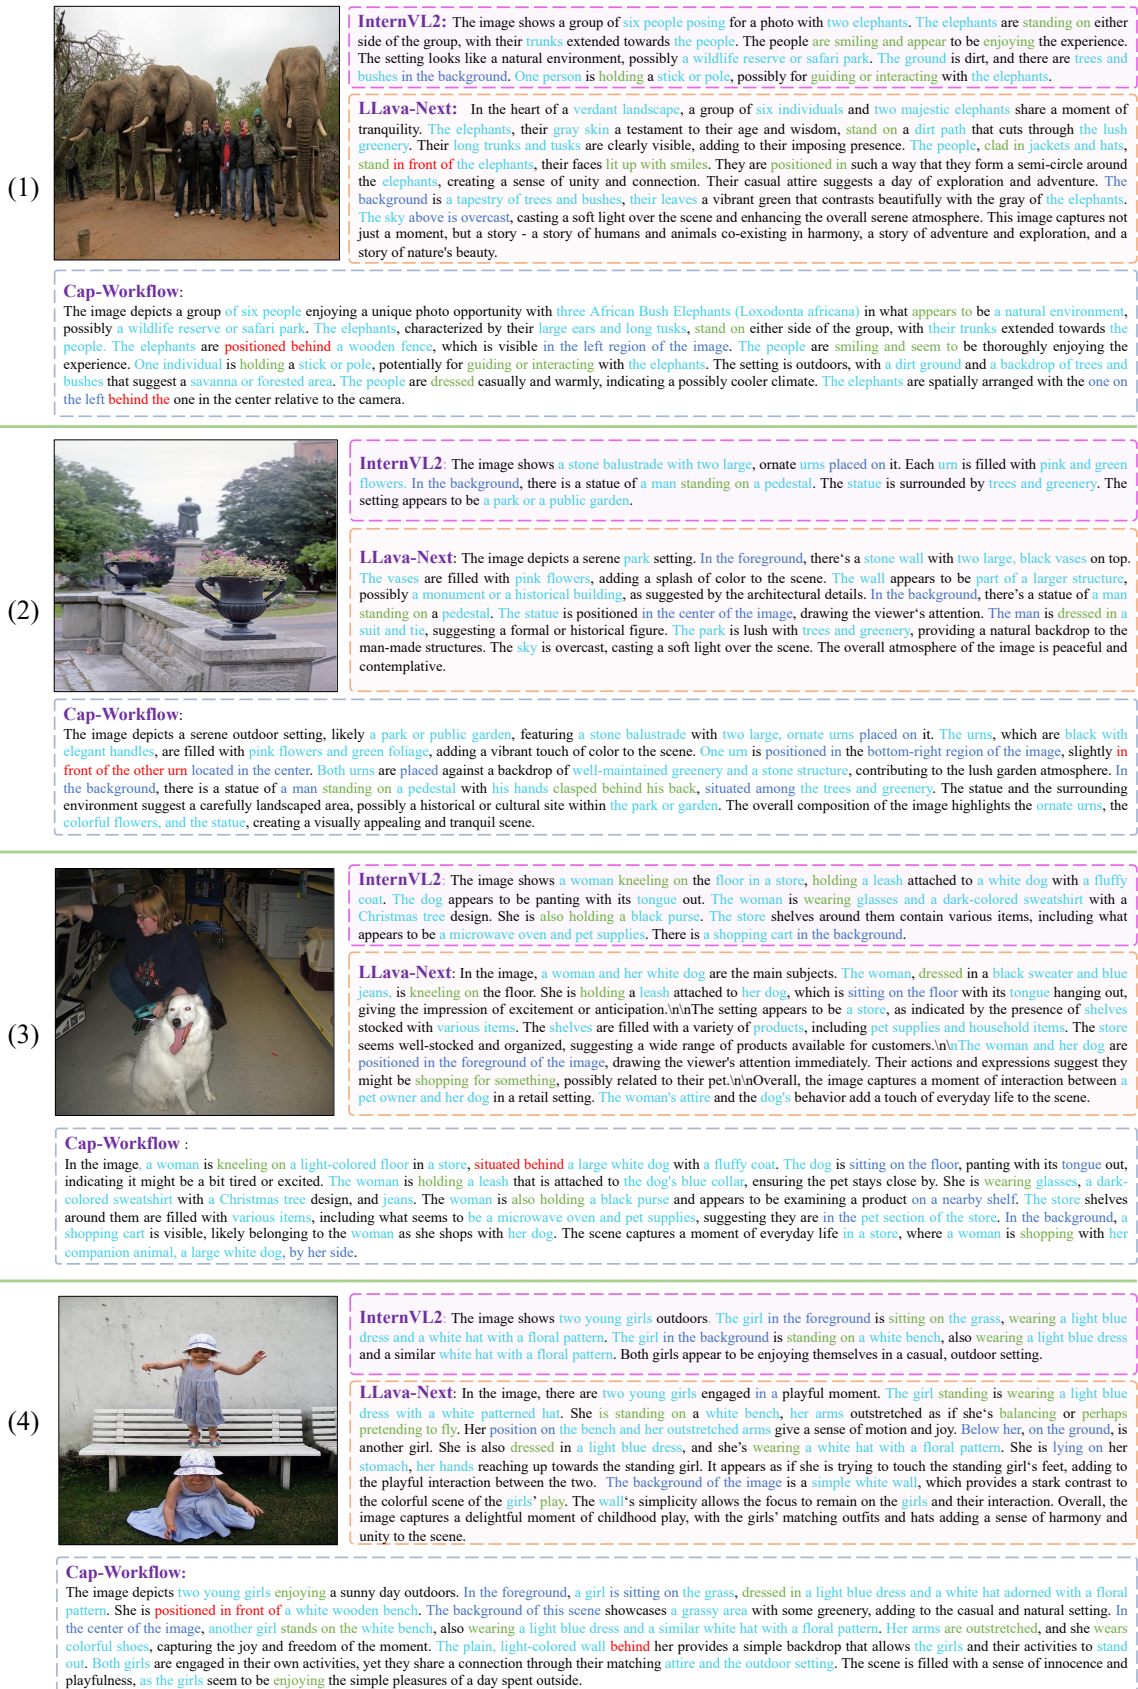

Figure 5. A comparison of image captions generated by InternVL2-26B, LLaVA-Next-34B, and Cap-Workflow. We highlight different types of information, including Object Attributes, OCR, HOI, 2D spatial relations and 3D spatial relations.
